# Supplementary material for: Pancreas-specific CHRM3 activation causes pancreatitis in mice
Source: PubMed Central journal article supplement (PMC8492327; doi:10.1172/jci.insight.132585), 2021-09-08

# Suppl Fig 1

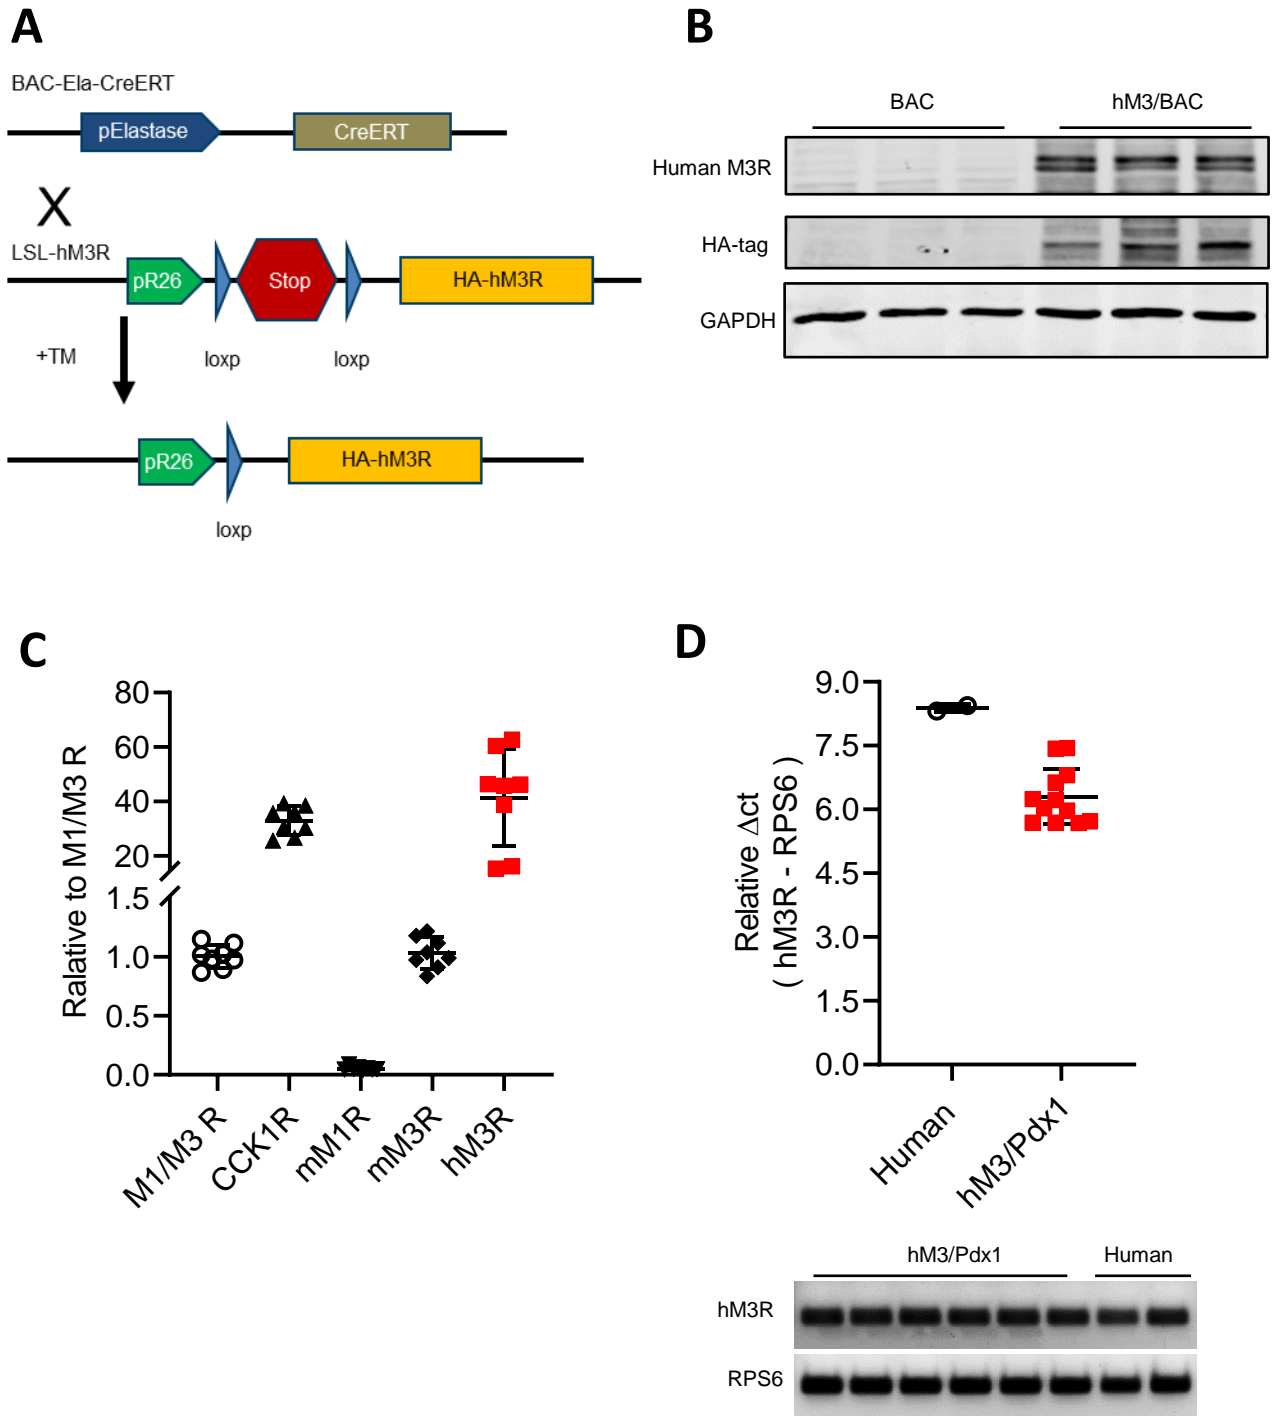

# Suppl Fig 2

A

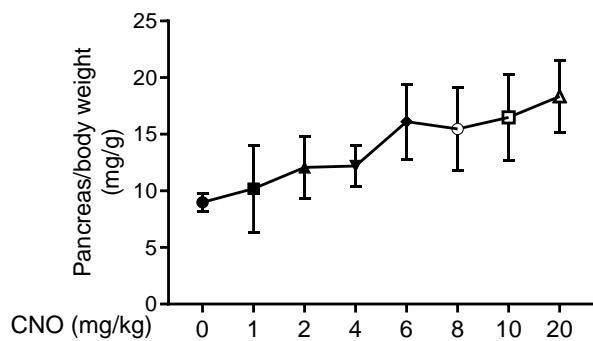

B

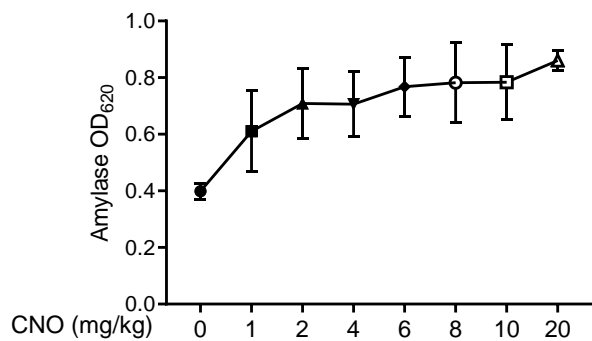

C

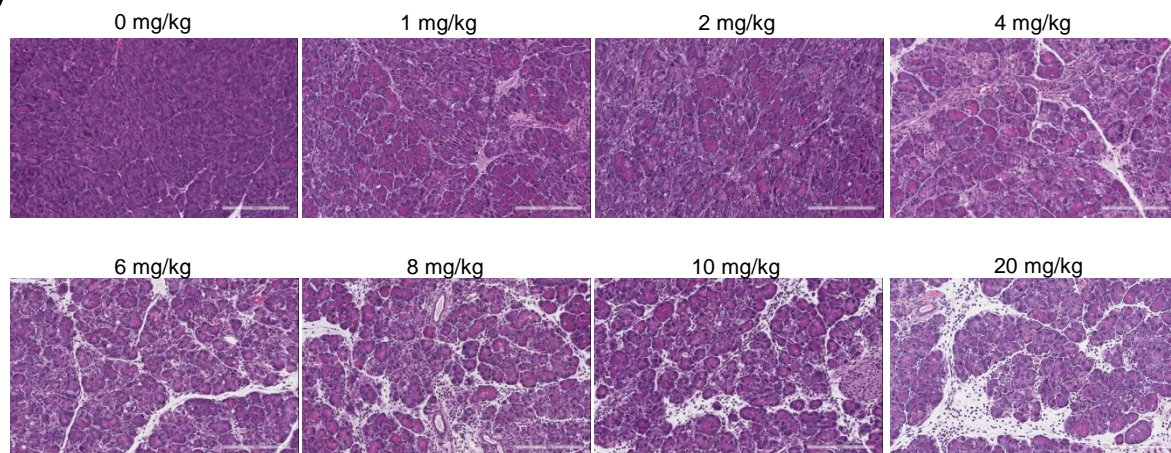

# Suppl Fig 3

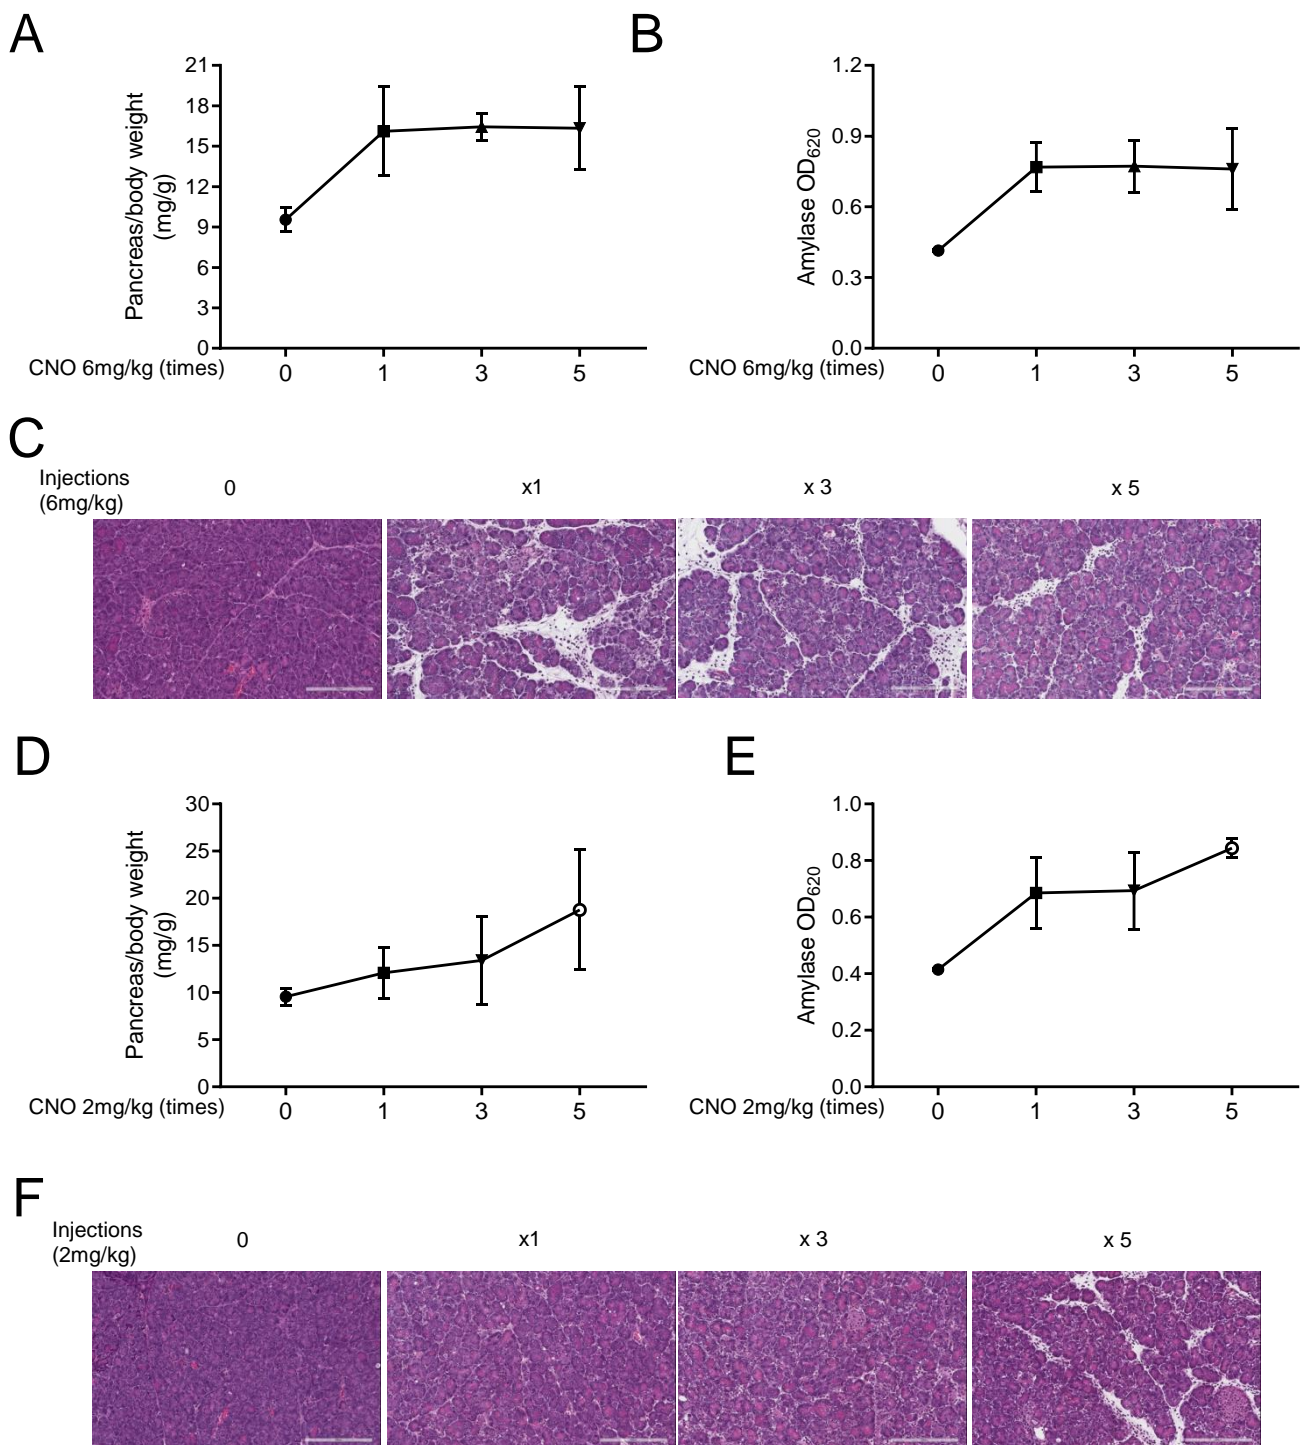

# Suppl Fig 4.

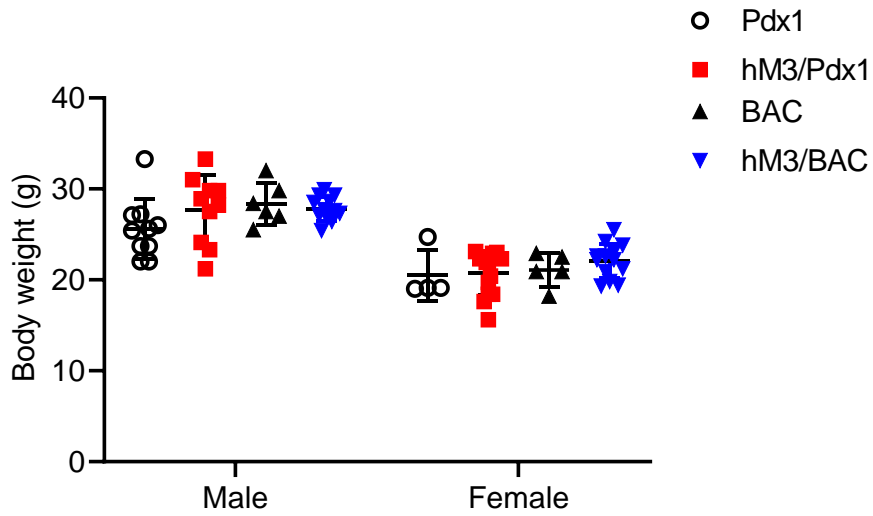

# Suppl Fig 5.

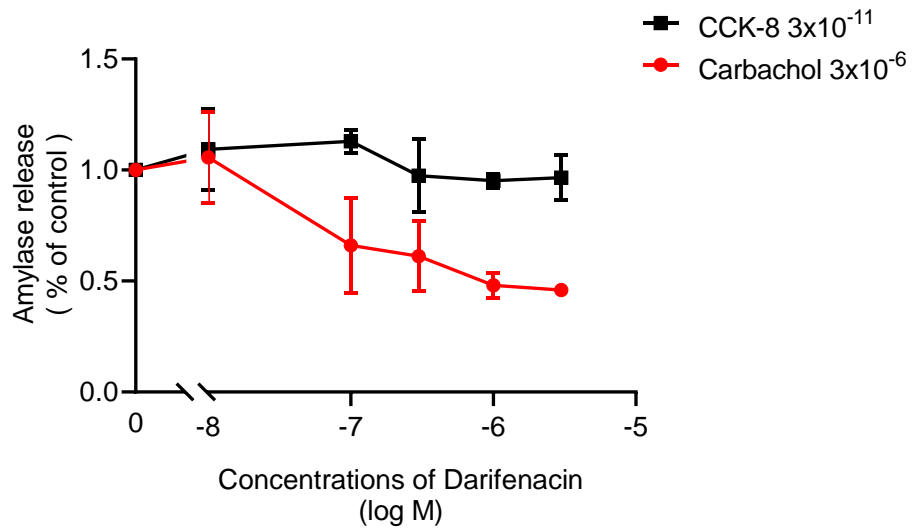

# Suppl Fig 6.

**A**

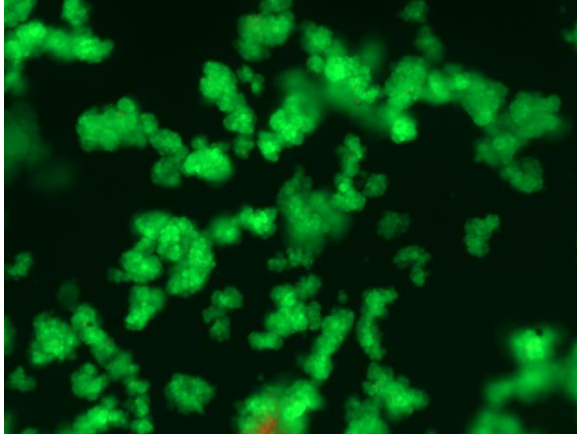

**B**

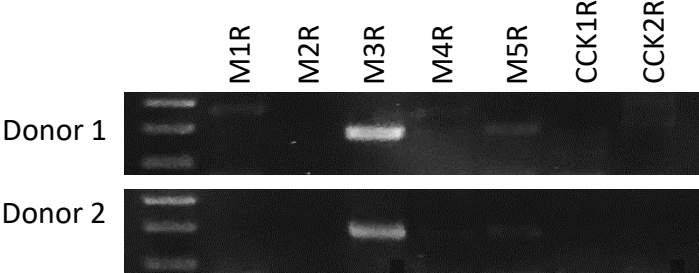

Supplement: jciinsight-6-132585-s018.pdf [file jciinsight-6-132585-s018.pdf]
